# Supplementary material for: ECL—Electrochemical luminescence
Source: Royal Society of Chemistry journal article supplement (doi:10.1039/b605635k), 2007-01-01
Supplement: b605635k2.pdf [file b605635k2.pdf]

**Table S2.** Spectroscopic and ECL properties of non-ruthenium inorganic and organometallic systems.

| Complex/Reactant                                              | Reaction Conditions                                         | $\lambda_{em}$ (nm) | $\lambda_{ecl}$ (nm) | $\phi_{em}$   | $\phi_{ecl}$ | Ref                 |
|---------------------------------------------------------------|-------------------------------------------------------------|---------------------|----------------------|---------------|--------------|---------------------|
| Alq <sub>3</sub> /TPD (Cross-R)                               | 50:50 v/v MeCN:Toluene (0.1 M TBAPF <sub>6</sub> )          | 527                 | 510                  | -----<br>--   | 0.09         | 443, <sup>a,b</sup> |
| Alq <sub>3</sub> /TPDF <sub>2</sub> (Cross-R)                 | 50:50 v/v MeCN:Toluene (0.1 M TBAPF <sub>6</sub> )          | 527                 | 510                  | -----<br>--   | 0.18         | 443                 |
| Al(qs) <sub>3</sub> /TPD (Cross-R)                            | 50:50 v/v MeCN:Toluene (0.1 M TBAPF <sub>6</sub> )          | 505                 | 510                  | -----<br>--   | 0.03         | 443, <sup>b</sup>   |
| Al(qs) <sub>3</sub> /TPDF <sub>2</sub> (Cross-R)              | 50:50 v/v MeCN:Toluene (0.1 M TBAPF <sub>6</sub> )          | 505                 | 510                  | -----<br>--   | 0.10         | 443, <sup>b</sup>   |
| Al(HQS) <sub>3</sub> /TPrA                                    | H <sub>2</sub> O (0.2 M KH <sub>2</sub> PO <sub>4</sub> )   | 499                 | 499                  | 0.06          | 0.002        | 135 <sup>c</sup>    |
| BODIPY                                                        | MeCN(0.1 M TBAPF <sub>6</sub> )                             | 506                 |                      | 0.92          |              | 138                 |
| PM 546                                                        | MeCN(0.1 M TBAPF <sub>6</sub> )                             | 501                 | 530                  | 0.95          |              | 138, <sup>m</sup>   |
| PM 567                                                        | MeCN(0.1 M TBAPF <sub>6</sub> )                             | 531                 | 550                  | 0.87          | ~0.009       | 138, <sup>m</sup>   |
| PM 580                                                        | MeCN(0.1 M TBAPF <sub>6</sub> )                             | 532                 | 555                  | 0.85          | ~0.007       | 138, <sup>m</sup>   |
| PM 597                                                        | MeCN(0.1 M TBAPF <sub>6</sub> )                             | 557                 | 585                  | 0.41          | ~0.003       | 138, <sup>m</sup>   |
| Similar to PM 567 but containing a phenyl ring at position 8. | CH <sub>2</sub> Cl <sub>2</sub> (0.1 M TBAPF <sub>6</sub> ) | 541                 | 541                  |               |              | 137                 |
| Dihydroazulene/Boron Dipyrromethene Dyad, 1a                  | MeCN                                                        | ~540                |                      | 0.62          |              | 137 <sup>n</sup>    |
| Dihydroazulene/Boron Dipyrromethene Dyad, 1b                  | MeCN                                                        | ~540                |                      | 0.01          |              | 137 <sup>n</sup>    |
| Cd(II)-phen/TPrA                                              | H <sub>2</sub> O (0.15M NaH <sub>2</sub> PO <sub>4</sub> )  |                     |                      |               |              | 444                 |
| CdSe NC                                                       | CH <sub>2</sub> Cl <sub>2</sub> (0.1M TBAClO <sub>4</sub> ) | 545                 | ~745                 | -----<br>---- | -----<br>--- | 162                 |
| Cr(bpy) <sub>3</sub> <sup>2+</sup>                            | MeCN(0.1MT BAP)                                             | 730                 | 730                  | -----<br>-    | -----        | 445                 |

|                                                                                                          |                                                                                 |         |       |             |                     |                  |
|----------------------------------------------------------------------------------------------------------|---------------------------------------------------------------------------------|---------|-------|-------------|---------------------|------------------|
| Cr(CN) <sub>6</sub> <sup>3-</sup>                                                                        | MeCN(0.1MT<br>BAP)                                                              | 800     | 800   | -----<br>-  | ~3x10 <sup>-4</sup> | 445              |
| Cr(bpy) <sub>3</sub> <sup>3+</sup> /S <sub>2</sub> O <sub>8</sub> <sup>2-</sup>                          | H <sub>2</sub> O(0.1M<br>NaCl)                                                  | 727     | 727   | 0.02        | 0.25                | 446 <sup>c</sup> |
| Cr(4,4'-Me <sub>2</sub> bpy) <sub>3</sub> <sup>3+</sup> /<br>S <sub>2</sub> O <sub>8</sub> <sup>2-</sup> | H <sub>2</sub> O(0.1M<br>NaCl)                                                  | 727     | 727   | 0.06        | 0.45                | 446 <sup>c</sup> |
| Cr(phen) <sub>3</sub> <sup>3+</sup> /S <sub>2</sub> O <sub>8</sub> <sup>2-</sup>                         | H <sub>2</sub> O(0.1M<br>NaCl)                                                  | 727     | 727   | 0.10        | 0.08                | 446 <sup>c</sup> |
| Cr(5-Cl-phen) <sub>3</sub> <sup>3+</sup> /S <sub>2</sub> O <sub>8</sub> <sup>2-</sup>                    | H <sub>2</sub> O(0.1M<br>NaCl)                                                  | 727     | 727   | 0.08        | 0.07                | 446 <sup>c</sup> |
| [Cu(pyridine)I] <sub>4</sub>                                                                             | CH <sub>2</sub> Cl <sub>2</sub> (0.1MT<br>BAPF <sub>6</sub> )                   | 698     | 698   | 0.05        | -----               | 143              |
| Cu(dmp) <sub>2</sub> (PF <sub>6</sub> ) <sub>2</sub> /TPrA                                               | MeCN(0.1MT<br>BAPF <sub>6</sub> )                                               | 519,642 | ----- | 0.04        | 0.004               | 57 <sup>c</sup>  |
| Cu(dmp) <sub>2</sub> (PF <sub>6</sub> ) <sub>2</sub> /TPrA                                               | MeCN:H <sub>2</sub> O<br>(50:50 v/v; 0.1<br>M KH <sub>2</sub> PO <sub>4</sub> ) | 519,642 | ----- | 0.04        | 0.002               | 57 <sup>c</sup>  |
| Cu(dmp) <sub>2</sub> (PF <sub>6</sub> ) <sub>2</sub> /TPrA                                               | H <sub>2</sub> O(0.1 M<br>KH <sub>2</sub> PO <sub>4</sub> )                     | 519,642 | ----- | 0.04        | 0.001               | 57 <sup>c</sup>  |
| Cu(II)-3,4(DAT)                                                                                          | H <sub>2</sub> O (0.2 M<br>KH <sub>2</sub> PO <sub>4</sub> )                    |         |       |             |                     | 447              |
| Eu(dibenzoylmethide) <sub>3</sub> ·<br>piperidine                                                        | MeCN(0.1M<br>TBAClO <sub>4</sub> )                                              | 612     | ----- | -----<br>-- | -----<br>-          | 448 <sup>d</sup> |
| Eu(dinaphthoylmethide)<br>) <sub>3</sub> ·piperidine                                                     | MeCN(0.1M<br>TBAClO <sub>4</sub> )                                              | 610     | ----- | -----<br>-- | -----<br>-          | 448 <sup>d</sup> |
| Eu(TTFA) <sub>3</sub> (phen)                                                                             | MeCN(0.05M<br>TBABF <sub>4</sub> )                                              | 610     | ----- | -----<br>-- | -----<br>-          | 143 <sup>d</sup> |
| (pipH <sup>+</sup> )Eu(DBM) <sub>4</sub> /S <sub>2</sub> O <sub>8</sub> <sup>2-</sup>                    | MeCN(0.1M<br>TBAPF <sub>6</sub> )                                               | 611     | 611   | 0.09<br>9   | 0.052               | 449              |
| (TBA)Eu(DBM) <sub>4</sub> /S <sub>2</sub> O <sub>8</sub> <sup>2-</sup>                                   | MeCN(0.1M<br>TBAPF <sub>6</sub> )                                               | 611     | 611   | 0.20        | 0.06                | 449              |
| (TBA)Eu(TTA) <sub>4</sub> /S <sub>2</sub> O <sub>8</sub> <sup>2-</sup>                                   | MeCN(0.1M<br>TBAPF <sub>6</sub> )                                               | 612     | 612   | 1.01        | 0.006               | 449              |
| (TBA)Eu(HFAC) <sub>4</sub> /<br>S <sub>2</sub> O <sub>8</sub> <sup>2-</sup>                              | MeCN(0.1M<br>TBAPF <sub>6</sub> )                                               | 611     | 611   | 0.09<br>5   | 0.01                | 449              |
| (TBA)Eu(BA) <sub>4</sub> /S <sub>2</sub> O <sub>8</sub> <sup>2-</sup>                                    | MeCN(0.1M<br>TBAPF <sub>6</sub> )                                               | 612     | 612   | 0.13        | 0.02                | 449              |
| (TBA)Eu(BTA) <sub>4</sub> /S <sub>2</sub> O <sub>8</sub> <sup>2-</sup>                                   | MeCN(0.1M<br>TBAPF <sub>6</sub> )                                               | 611     | 611   | 1.2         | 0.01                | 449              |
| Eu[2.2.2](NO <sub>3</sub> ) <sub>3</sub> /S <sub>2</sub> O <sub>8</sub> <sup>2-</sup>                    | MeCN(0.1M<br>TBAPF <sub>6</sub> )                                               | 612     | ----- | 0.00<br>04  | -----<br>-          | 449              |

|                                                                                                 |                                                                                 |          |       |             |                    |                  |
|-------------------------------------------------------------------------------------------------|---------------------------------------------------------------------------------|----------|-------|-------------|--------------------|------------------|
| Eu[2.2.1](NO <sub>3</sub> ) <sub>3</sub> /S <sub>2</sub> O <sub>8</sub> <sup>2-</sup>           | MeCN(0.1M<br>TBAPF <sub>6</sub> )                                               | 612      | ----- | -----       | -----              | 449              |
|                                                                                                 |                                                                                 |          |       | --          | -                  |                  |
| Eu[2.2.1](DBM)(NO <sub>3</sub> ) <sub>2</sub><br>/S <sub>2</sub> O <sub>8</sub> <sup>2-</sup>   | MeCN(0.1M<br>TBAPF <sub>6</sub> )                                               | 612      | 612   | 0.00<br>02  | 2x10 <sup>-4</sup> | 449              |
| Eu[2.2.1](BA)(NO <sub>3</sub> ) <sub>2</sub> /<br>S <sub>2</sub> O <sub>8</sub> <sup>2-</sup>   | MeCN(0.1M<br>TBAPF <sub>6</sub> )                                               | 612      | 612   | 0.00<br>13  | 5x10 <sup>-5</sup> | 449              |
| Eu[2.2.1](TTA)(NO <sub>3</sub> ) <sub>2</sub> /<br>S <sub>2</sub> O <sub>8</sub> <sup>2-</sup>  | MeCN(0.1M<br>TBAPF <sub>6</sub> )                                               | 614      | ----- | 0.00<br>11  | -----<br>-         | 449              |
| Eu[2.2.1](BTA)(NO <sub>3</sub> ) <sub>2</sub> /<br>S <sub>2</sub> O <sub>8</sub> <sup>2-</sup>  | MeCN(0.1M<br>TBAPF <sub>6</sub> )                                               | 612      | ----- | 0.04<br>6   | -----<br>-         | 449              |
| Eu[2.2.1](HFAC)(NO <sub>3</sub> ) <sub>2</sub> /<br>S <sub>2</sub> O <sub>8</sub> <sup>2-</sup> | MeCN(0.1M<br>TBAPF <sub>6</sub> )                                               | 613      | ----- | 0.00<br>14  | -----<br>-         | 449              |
| Au(I)-(2,4-DAT)                                                                                 | H <sub>2</sub> O (0.2 M<br>KH <sub>2</sub> PO <sub>4</sub> )                    |          |       |             |                    | 450              |
| Ir(ppy) <sub>3</sub>                                                                            | MeCN(0.1M<br>TBABF <sub>4</sub> )                                               | 495      | ----- | -----<br>-- | -----<br>-         | 143              |
| Ir(ppy) <sub>3</sub>                                                                            | Benzonitrile                                                                    | 530      | 530   | -----<br>-- | -----<br>-         | 145              |
| Ir(ppy) <sub>3</sub>                                                                            | MeCN(0.1M<br>TBAPF <sub>6</sub> )                                               | 510      | 510   | -----<br>-- | 0.14               | 146 <sup>b</sup> |
| Ir(ppy) <sub>3</sub> /TPrA                                                                      | MeCN (0.1<br>MTBAPF <sub>6</sub> )                                              | 517      | 517   | 0.14        | 0.33               | 147              |
| Ir(ppy) <sub>3</sub> /TPrA                                                                      | MeCN:H <sub>2</sub> O<br>(50:50 v/v; 0.1<br>M KH <sub>2</sub> PO <sub>4</sub> ) | 507, 532 | 517   | 0.10        | 0.004<br>4         | 147              |
| Ir(ppy) <sub>3</sub> /TPrA                                                                      | H <sub>2</sub> O (0.1 M<br>KH <sub>2</sub> PO <sub>4</sub> )                    | 507, 532 | 517   | 0.08        | 0.000<br>92        | 147              |
| Ir(ppy) <sub>3</sub> /2-                                                                        | MeCN:dioxan<br>e (1:1 v/v);<br>(0.1 M                                           | -----    | 517   | -----       | 0.67               | 153              |

|                                                          |                                                     |       |      |             |      |     |
|----------------------------------------------------------|-----------------------------------------------------|-------|------|-------------|------|-----|
| cyanofluorene (Cross-R)                                  | TBAPF <sub>6</sub> )                                |       |      | --          |      |     |
| Ir(ppy) <sub>3</sub> /4-cyano-4'-methylbiphenyl(Cross-R) | MeCN:dioxane (1:1 v/v); (0.1 M TBAPF <sub>6</sub> ) | ----- | 517  | -----<br>-- | 0.59 | 153 |
| Ir(ppy) <sub>3</sub> /4-cyanobiphenyl (Cross-R)          | MeCN:dioxane (1:1 v/v); (0.1 M TBAPF <sub>6</sub> ) | ----- | 517  | -----<br>-- | 0.62 | 153 |
| Ir(ppy) <sub>3</sub> /2-cyanonaphthalene (Cross-R)       | MeCN:dioxane (1:1 v/v); (0.1 M TBAPF <sub>6</sub> ) | ----- | 517  | -----<br>-- | 0.29 | 153 |
| Ir(ppy) <sub>3</sub> /1-cyanonaphthalene (Cross-R)       | MeCN:dioxane (1:1 v/v); (0.1 M TBAPF <sub>6</sub> ) | ----- | 517  | -----<br>-- | 0.36 | 153 |
| Ir(ppy) <sub>3</sub> /4-acetylbiphenyl (Cross-R)         | MeCN:dioxane (1:1 v/v); (0.1 M TBAPF <sub>6</sub> ) | ----- | 517  | -----<br>-- | 0.26 | 153 |
| Ir(ppy) <sub>3</sub> /2-acetylnaphthalene (Cross-R)      | MeCN:dioxane (1:1 v/v); (0.1 M TBAPF <sub>6</sub> ) | ----- | ~517 | -----<br>-- | 0.37 | 153 |
| Ir(ppy) <sub>3</sub> /9-cyanophenanthrene (Cross-R)      | MeCN:dioxane (1:1 v/v); (0.1 M TBAPF <sub>6</sub> ) | ----- | ~517 | -----<br>-- | 0.33 | 153 |

|                                                                      |                                                             |       |      |             |                      |     |
|----------------------------------------------------------------------|-------------------------------------------------------------|-------|------|-------------|----------------------|-----|
| Ir(ppy) <sub>3</sub> /1-acetylnaphthalene<br>(Cross-R)               | Acetonitrile:dioxane (1:1 v/v); (0.1 M TBAPF <sub>6</sub> ) | ----- | ~517 | -----<br>-- | 0.30                 | 153 |
| Ir(ppy) <sub>3</sub> /benzophenone<br>(Cross-R)                      | MeCN:dioxane (1:1 v/v); (0.1 M TBAPF <sub>6</sub> )         | ----- | ~517 | -----<br>-- | 0.25                 | 153 |
| Ir(ppy) <sub>3</sub> /1,2-dicyanobenzene<br>(Cross-R)                | MeCN:dioxane (1:1 v/v); (0.1 M TBAPF <sub>6</sub> )         | ----- | ~517 | -----<br>-- | 0.20                 | 153 |
| Ir(ppy) <sub>3</sub> /4,4'-dicyanobiphenyl<br>(Cross-R)              | MeCN:dioxane (1:1 v/v); (0.1 M TBAPF <sub>6</sub> )         | ----- | ~517 | -----<br>-- | 0.23                 | 153 |
| Ir(ppy) <sub>3</sub> /4-cyanobenzoic acid methyl ester<br>(Cross-R)  | MeCN:dioxane (1:1 v/v); (0.1 M TBAPF <sub>6</sub> )         | ----- | ~517 | -----<br>-- | 3.7x10 <sup>-2</sup> | 153 |
| Ir(ppy) <sub>3</sub> /4-acetylbenzoic acid methyl ester<br>(Cross-R) | MeCN:dioxane (1:1 v/v); (0.1 M TBAPF <sub>6</sub> )         | ----- | ~517 | -----<br>-- | 6.0x10 <sup>-4</sup> | 153 |
| Ir(ppy) <sub>3</sub> /1,4-dicyanobenzene<br>(Cross-R)                | MeCN:dioxane (1:1 v/v); (0.1 M TBAPF <sub>6</sub> )         | ----- | ~517 | -----<br>-- | 2.2x10 <sup>-3</sup> | 153 |
| Ir(ppy) <sub>3</sub> /4-acetylbenzotrile<br>(Cross-R)                | MeCN:dioxane (1:1 v/v); (0.1 M TBAPF <sub>6</sub> )         | ----- | ~517 | -----<br>-- | 4.0x10 <sup>-5</sup> | 153 |

|                                                                             |                                                        |                 |       |             |                      |     |
|-----------------------------------------------------------------------------|--------------------------------------------------------|-----------------|-------|-------------|----------------------|-----|
| Ir(ppy) <sub>3</sub> /4-acetylacetophenone (Cross-R)                        | MeCN:dioxane (1:1 v/v); (0.1 M TBAPF <sub>6</sub> )    | -----           | ~517  | -----       | 1.7x10 <sup>-5</sup> | 153 |
| [Ir(COD)(μ-pz)] <sub>2</sub>                                                | THF(0.3M TBABF <sub>4</sub> )                          | 682             | 694   | -----<br>-- | -----<br>-           | 451 |
| [Ir(COD)(μ-mpz)] <sub>2</sub>                                               | THF(0.3M TBABF <sub>4</sub> )                          | -----           | ----- | -----<br>-- | -----<br>-           | 451 |
| [Ir(COD)(μ-dmpz)] <sub>2</sub>                                              | THF(0.3M TBABF <sub>4</sub> )                          | 714             | 719   | -----<br>-- | -----<br>-           | 451 |
| [Ir(COD)(μ-pz)] <sub>2</sub> /C <sub>2</sub> O <sub>4</sub> <sup>2-</sup>   | THF(0.3M TBABF <sub>4</sub> )                          | 682             | 694   | -----<br>-- | -----<br>-           | 451 |
| [Ir(COD)(μ-dmpz)] <sub>2</sub> /C <sub>2</sub> O <sub>4</sub> <sup>2-</sup> | THF(0.3M TBABF <sub>4</sub> )                          | 714             | 719   | -----<br>-- | -----<br>-           | 451 |
| FIr(pic)/TPrA                                                               | MeCN (0.05 M TPrA; 0.1 M )                             | 468;<br>490(sh) | 498   | 0.10<br>04  | 0.030                | 150 |
| FIr(pic)/TPrA                                                               | MeCN/H <sub>2</sub> O (0.2 M KPB; TBAPF <sub>6</sub> ) | 467;<br>494(sh) | 498   | 0.03<br>89  | 0.45                 | 150 |
| FIr(pic)/TPrA                                                               | H <sub>2</sub> O (0.2 M KPB)                           | 472;<br>497(sh) | 498   | 0.00<br>48  | 0.000<br>10          | 150 |
| FIr(pic)/TPrA                                                               | H <sub>2</sub> O w/ .4 mM Triton (0.2 M KPB)           | 471;<br>497(sh) | 498   | 0.05<br>75  | 0.000<br>63          | 150 |
| FIr(pic)/TPrA                                                               | H <sub>2</sub> O w/ .8 mM Triton (0.2 M KPB)           | 474;<br>496(sh) | 498   | 0.07<br>66  | 0.000<br>67          | 150 |
| (btp) <sub>2</sub> Ir(acac)/TPrA                                            | MeCN (0.05 M TPrA; 0.1 M )                             | 576             | 601   | 0.00<br>204 | 0.28                 | 150 |
| (btp) <sub>2</sub> Ir(acac)/TPrA                                            | MeCN/H <sub>2</sub> O (0.2 M KPB; TBAPF <sub>6</sub> ) | 600             | 603   | 0.00<br>15  | 0.049                | 150 |
| (btp) <sub>2</sub> Ir(acac)/TPrA                                            | H <sub>2</sub> O (0.2 M KPB)                           | 609             | ----  | 0.00<br>20  | 0.000<br>098         | 150 |
| (btp) <sub>2</sub> Ir(acac)/TPrA                                            | H <sub>2</sub> O w/ .4 mM Triton (0.2 M KPB)           | 609             | ----  | 0.00<br>50  | 0.000<br>20          | 150 |
| (btp) <sub>2</sub> Ir(acac)/TPrA                                            | H <sub>2</sub> O w/ .8 mM Triton (0.2 M KPB)           | 609             | ----  | 0.00<br>54  | 0.000<br>33          | 150 |
| Ir(ppy) <sub>3</sub> /TprA                                                  | Adsorbed in                                            |                 |       |             |                      | 152 |

|                                                                                 |                                                                                               |     |     |      |      |                  |
|---------------------------------------------------------------------------------|-----------------------------------------------------------------------------------------------|-----|-----|------|------|------------------|
|                                                                                 | PVK. 0.2 M<br>KPB; 0.05 M<br>TPrA                                                             |     |     |      |      |                  |
| Ir(ppy) <sub>3</sub> /TPrA                                                      | Adsorbed in<br>PVK. MeCN<br>with 0.05 M<br>TPrA and 0.1<br>M Bu <sub>4</sub> NPF <sub>6</sub> |     |     |      |      | 152              |
| FIr(pic)/TPrA                                                                   | Adsorbed in<br>PVK. 0.2 M<br>KPB; 0.05 M<br>TPrA                                              |     |     |      |      | 152              |
| FIr(pic)/TPrA                                                                   | Adsorbed in<br>PVK. MeCN<br>with 0.05 M<br>TPrA and 0.1<br>M Bu <sub>4</sub> NPF <sub>6</sub> |     |     |      |      | 152              |
| FIr(pic)/TPrA                                                                   | Adsorbed in<br>Nafion. 0.2 M<br>KPB; 0.05 M<br>TPrA                                           |     |     |      |      | 152              |
| (btp) <sub>2</sub> Ir(acac)/TPrA                                                | Adsorbed in<br>PVK. 0.2 M<br>KPB; 0.05 M<br>TPrA                                              |     |     |      |      | 152              |
| (btp) <sub>2</sub> Ir(acac)/TPrA                                                | Adsorbed in<br>PVK. MeCN<br>with 0.05 M<br>TPrA and 0.1<br>M Bu <sub>4</sub> NPF <sub>6</sub> |     |     |      |      | 152              |
| [(ppy) <sub>2</sub> Ir(bpy)] <sup>+</sup> /TPrA                                 | MeCN(0.1M<br>TBAPF <sub>6</sub> )                                                             | 606 | 606 | 0.06 | 2    | 156 <sup>P</sup> |
| [(ppy) <sub>2</sub> Ir(phen)] <sup>+</sup> /TPrA                                | MeCN(0.1M<br>TBAPF <sub>6</sub> )                                                             | 599 | 606 | 0.14 | 4    | 156 <sup>P</sup> |
| (pq) <sub>2</sub> Ir(acac)/TPrA                                                 | MeCN(0.1M<br>TBAPF <sub>6</sub> )                                                             | 589 | 609 | 0.10 | 77   | 156 <sup>P</sup> |
| (pq) <sub>2</sub> Ir(tmd)/TPrA                                                  | MeCN(0.1M<br>TBAPF <sub>6</sub> )                                                             | 593 | 615 | 0.10 | 49   | 156 <sup>P</sup> |
| Ir(245F <sub>3</sub> PBI) <sub>2</sub> (pic)/<br>dicyanobiphenyl<br>(Cross-R)   | MeCN:dioxan<br>e (1:1 v/v);<br>(0.1 M<br>TBAPF <sub>6</sub> )                                 | 481 | 481 | 0.30 | 0.20 | 154              |
| Ir(245F <sub>3</sub> PBI) <sub>2</sub> (acac)<br>/ dicyanobiphenyl<br>(Cross-R) | MeCN:dioxan<br>e (1:1 v/v);<br>(0.1 M<br>TBAPF <sub>6</sub> )                                 | 488 | 488 | 0.12 | 0.12 | 154              |
| Ir(24F <sub>2</sub> PBI) <sub>2</sub> (pic)/                                    | MeCN:dioxan                                                                                   | 481 | 481 | 0.38 | 0.37 | 154              |

|                                                                                       |                                                               |     |     |      |      |     |
|---------------------------------------------------------------------------------------|---------------------------------------------------------------|-----|-----|------|------|-----|
| dicyanobiphenyl<br>(Cross-R)                                                          | e (1:1 v/v);<br>(0.1 M<br>TBAPF <sub>6</sub> )                |     |     |      |      |     |
| Ir(24F <sub>2</sub> PBI) <sub>2</sub> (acac)/<br>dicyanobiphenyl<br>(Cross-R)         | MeCN:dioxan<br>e (1:1 v/v);<br>(0.1 M<br>TBAPF <sub>6</sub> ) | 493 | 493 | 0.28 | 0.21 | 154 |
| Ir(25F <sub>2</sub> PBI) <sub>2</sub> (pic)/<br>dicyanobiphenyl<br>(Cross-R)          | MeCN:dioxan<br>e (1:1 v/v);<br>(0.1 M<br>TBAPF <sub>6</sub> ) | 429 | 429 | 0.51 | 0.29 | 154 |
| Ir(25F <sub>2</sub> PBI) <sub>2</sub> (acac)/<br>dicyanobiphenyl<br>(Cross-R)         | MeCN:dioxan<br>e (1:1 v/v);<br>(0.1 M<br>TBAPF <sub>6</sub> ) | 502 | 502 | 0.31 | 0.27 | 154 |
| Ir(35F <sub>2</sub> PBI) <sub>2</sub> (pic)/<br>dicyanobiphenyl<br>(Cross-R)          | MeCN:dioxan<br>e (1:1 v/v);<br>(0.1 M<br>TBAPF <sub>6</sub> ) | 501 | 501 | 0.59 | 0.43 | 154 |
| Ir(35F <sub>2</sub> PBI) <sub>2</sub> (acac)/<br>dicyanobiphenyl<br>(Cross-R)         | MeCN:dioxan<br>e (1:1 v/v);<br>(0.1 M<br>TBAPF <sub>6</sub> ) | 512 | 512 | 0.48 | 0.46 | 154 |
| (F-pbt) <sub>2</sub> Ir(acac)/1,4-<br>dicyanonaphthalene                              | MeCN:dioxan<br>e (1:1 v/v);<br>(0.1 M<br>TBAPF <sub>6</sub> ) | 545 | 545 | 0.54 | 0.30 | 155 |
| (F-pbt) <sub>2</sub> Ir(acac)/4-<br>acetylbenzotrile<br>(Cross-R)                     | MeCN:dioxan<br>e (1:1 v/v);<br>(0.1 M<br>TBAPF <sub>6</sub> ) | 545 | 545 | 0.54 | 0.37 | 155 |
| (CH <sub>3</sub> O-pbt<br>) <sub>2</sub> Ir(acac)/1,4-<br>dicaynobenzene<br>(Cross-R) | MeCN:dioxan<br>e (1:1 v/v);<br>(0.1 M<br>TBAPF <sub>6</sub> ) | 548 | 548 | 0.46 | 0.38 | 155 |
| (CH <sub>3</sub> -pbt<br>) <sub>2</sub> Ir(acac)/1,4-<br>dicaynobenzene<br>(Cross-R)  | MeCN:dioxan<br>e (1:1 v/v);<br>(0.1 M<br>TBAPF <sub>6</sub> ) | 560 | 560 | 0.41 | 0.22 | 155 |
| (F <sub>2</sub> -pbt) <sub>2</sub> Ir(acac)/1,4-                                      | MeCN:dioxan                                                   | 562 | 562 | 0.46 | 0.35 | 155 |



|                                                                                                               |                                                             |      |       |             |            |                      |
|---------------------------------------------------------------------------------------------------------------|-------------------------------------------------------------|------|-------|-------------|------------|----------------------|
| dicyanonaphthalene (Cross-R)                                                                                  | e (1:1 v/v); (0.1 M TBAPF <sub>6</sub> )                    |      |       |             |            |                      |
| (pbt) <sub>2</sub> Ir(acac)/1,4-dicyanonaphthalene (Cross-R)                                                  | MeCN:dioxane (1:1 v/v); (0.1 M TBAPF <sub>6</sub> )         | 566  | 566   | 0.44        | 0.27       | 155                  |
| (pbt) <sub>2</sub> Ir(acac)/1,4-dicaynobenzene (Cross-R)                                                      | MeCN:dioxane (1:1 v/v); (0.1 M TBAPF <sub>6</sub> )         | 566  | 566   | 0.44        | 0.32       | 155                  |
| (CF <sub>3</sub> -pbt) <sub>2</sub> Ir(acac)/1,4-dicyanonaphthalene (Cross-R)                                 | MeCN:dioxane (1:1 v/v); (0.1 M TBAPF <sub>6</sub> )         | 576  | 576   | 0.32        | 0.29       | 155                  |
| IrL <sub>2</sub> (acac)/aromatic nitriles (Cross-R) (L = 2-phenylbenzothiazole ligands)                       | MeCN:dioxane (1:1 v/v); (0.1 M TBAPF <sub>6</sub> )         |      |       |             |            | 155                  |
| Hg-DALM/TPrA                                                                                                  | H <sub>2</sub> O (0.15 M NaH <sub>2</sub> PO <sub>4</sub> ) |      |       |             |            | 452-453              |
| Mo <sub>6</sub> Cl <sub>14</sub> <sup>2-</sup>                                                                | MeCN(0.1M TBAP)                                             | 700  | 700   | 0.19        | -----<br>- | 454                  |
| Mo <sub>6</sub> Cl <sub>14</sub> <sup>-</sup> /D <sup>-</sup> (Cross-R)                                       | CH <sub>2</sub> Cl <sub>2</sub> (0.1M TBAP)                 | ~700 | ~700  | -----<br>-- | -----<br>- | 455-458 <sup>e</sup> |
| Mo <sub>6</sub> Cl <sub>14</sub> <sup>3-</sup> /A <sup>+</sup> (Cross-R)                                      | CH <sub>2</sub> Cl <sub>2</sub> (0.1M TBAP)                 | ~700 | ~700  | -----<br>-- | -----<br>- | 455-458 <sup>f</sup> |
| Mo <sub>2</sub> Cl <sub>4</sub> (PMe <sub>3</sub> ) <sub>4</sub>                                              | THF(0.1M TBABF <sub>4</sub> )                               | 680  | 680   | 0.13        | 0.002      | 459                  |
| Mo <sub>2</sub> Cl <sub>4</sub> (PMe <sub>3</sub> ) <sub>4</sub> /S <sub>2</sub> O <sub>8</sub> <sup>2-</sup> | THF(0.1M TBABF <sub>4</sub> )                               | 680  | 680   | 0.13        | -----<br>- | 459                  |
| Mo <sub>2</sub> Cl <sub>4</sub> (PMe <sub>3</sub> ) <sub>4</sub> /C <sub>2</sub> O <sub>4</sub> <sup>-</sup>  | THF(0.1M TBABF <sub>4</sub> )                               | 680  | ----- | 0.13        | -----<br>- | 459                  |
| Os(bpy) <sub>3</sub> <sup>2+</sup>                                                                            | MeCN                                                        | 724  | 720   | 0.00<br>462 | -----      | 460                  |
| Os(bpy) <sub>2</sub> (diphos) <sup>2+</sup>                                                                   | MeCN                                                        | 612  | 610   | 0.05<br>50  | ~0.7       | 460                  |
| Os(bpy) <sub>2</sub> (dppene) <sup>2+</sup>                                                                   | MeCN                                                        | 605  | 606   | 0.06<br>99  | -----      | 460                  |
| Os(bpy) <sub>2</sub> (DMSO) <sub>2</sub> <sup>2+</sup>                                                        | MeCN                                                        | 575  | ----- | -----<br>-  | -----      | 460                  |
| Os(bpy) <sub>2</sub> dpae <sup>2+</sup>                                                                       | MeCN                                                        | 632  | 633   | -----<br>-  | -----      | 460                  |

|                                                                                                                            |                                                                |       |       |               |            |                  |
|----------------------------------------------------------------------------------------------------------------------------|----------------------------------------------------------------|-------|-------|---------------|------------|------------------|
| Os(bpz) <sub>3</sub> <sup>2+</sup>                                                                                         | MeCN                                                           | 700   | 700   | -----<br>-    | -----      | 461              |
| Os(phen) <sub>3</sub> <sup>2+</sup>                                                                                        | DMF                                                            | 690   | 691   | 0.01<br>59    | -----      | 460              |
| Os(phen) <sub>3</sub> <sup>2+</sup> /S <sub>2</sub> O <sub>8</sub> <sup>2-</sup>                                           | MeCN                                                           | ----- | 740   | 0.32          | 0.40       | 158              |
| Os(phen) <sub>2</sub> (diphos) <sup>2+</sup>                                                                               | MeCN                                                           | 601   | 600   | 0.13<br>8     | -----      | 460              |
| Os(phen) <sub>2</sub> (dppene) <sup>2+</sup>                                                                               | MeCN                                                           | 597   | 599   | 0.23<br>9     | -----      | 460              |
| Os(phen) <sub>2</sub> dpae <sup>2+</sup>                                                                                   | MeCN                                                           | 622   | ----- | 0.12<br>1     | -----      | 460              |
| Os(bpy) <sub>2</sub> (dppene) <sup>2+</sup> /<br>TPrA                                                                      | CH <sub>3</sub> CN:H <sub>2</sub> O<br>(50:50 v/v)             | 368   | 585   | 0.08<br>8     | 0.95       | 462              |
| Os(bpy) <sub>2</sub> (dppene) <sup>2+</sup> /<br>TPrA                                                                      | H <sub>2</sub> O (0.2 M<br>KH <sub>2</sub> PO <sub>4</sub> )   | 368   | 589   | 0.15<br>7     | 2.0        | 462 <sup>c</sup> |
| [Os(4,4'-distyryl-2,2'-<br>bipyridine) <sub>2</sub> (bis-1,2-<br>phenylphoninoethane)]<br><sup>2+</sup> polymer            | CH <sub>3</sub> CN<br>(TBAClO <sub>4</sub> )                   | 635   | 635   | -----<br>-    | -----      | 159              |
| Pd(TPP)                                                                                                                    | CH <sub>2</sub> Cl <sub>2</sub> (0.1 M<br>TBAPF <sub>6</sub> ) | 700   | 700   | -----<br>--   | -----<br>- | 463              |
| Pt(TPP)                                                                                                                    | CH <sub>2</sub> Cl <sub>2</sub> (0.1 M<br>TBAPF <sub>6</sub> ) | 654   | 656   | -----<br>--   | -----<br>- | 463              |
| Pt <sub>2</sub> (P <sub>2</sub> H <sub>2</sub> O <sub>5</sub> ) <sub>4</sub> <sup>4-</sup>                                 | MeCN (0.1M<br>TBABF <sub>4</sub> )                             | 517   | 517   | -----<br>--   | -----<br>- | 464              |
| Pt <sub>2</sub> (P <sub>2</sub> H <sub>2</sub> O <sub>5</sub> ) <sub>4</sub> <sup>4-</sup> /Bu <sub>4</sub> N <sup>+</sup> | MeCN (0.1M<br>TBABF <sub>4</sub> )                             | 512   | 512   | -----<br>--   | -----<br>- | 465              |
| Pt(thpy) <sub>2</sub>                                                                                                      | DMF(0.1 M<br>TBAPF <sub>6</sub> )                              | 580   | 580   | 1.2           | 0.005      | 466              |
| Pt(thpy) <sub>2</sub> /S <sub>2</sub> O <sub>8</sub> <sup>2-</sup>                                                         | DMF(0.1 M<br>TBAPF <sub>6</sub> )                              | 580   | ----- | -----<br>---- | -----<br>- | 466              |
| Pt(q) <sub>2</sub>                                                                                                         | MeCN(0.005<br>MTBABF <sub>4</sub> )                            | 650   | >530  | 0.01          | -----<br>- | 143              |
| Pt <sub>2</sub> (dba) <sub>3</sub>                                                                                         | CH <sub>2</sub> Cl <sub>2</sub> (0.1M<br>TBAPF <sub>6</sub> )  | 782   | ~780  | 0.95          | -----<br>- | 467 <sup>g</sup> |
| Pt <sub>3</sub> (tbaa) <sub>3</sub>                                                                                        | CH <sub>2</sub> Cl <sub>2</sub> (0.1M<br>TBAPF <sub>6</sub> )  | 782   | ~780  | 1.05          | -----<br>- | 467 <sup>g</sup> |
| Pt <sub>2</sub> (dba) <sub>3</sub>                                                                                         | CH <sub>2</sub> Cl <sub>2</sub> (0.1M<br>TBAPF <sub>6</sub> )  | 726   | ----- | 0.29          | -----<br>- | 467 <sup>g</sup> |
| Pt <sub>3</sub> (tbaa) <sub>3</sub>                                                                                        | CH <sub>2</sub> Cl <sub>2</sub> (0.1M<br>TBAPF <sub>6</sub> )  | 724   | ----- | 0.28          | -----<br>- | 467 <sup>g</sup> |
| Pt(OEP)                                                                                                                    | CH <sub>2</sub> Cl <sub>2</sub> (0.1M<br>TBAPF <sub>6</sub> )  | 619   | 619   | -----<br>--   | 0.02       | 146              |
| Re(CO) <sub>3</sub> Cl(phen)                                                                                               | MeCN(0.1 M<br>TBAClO <sub>4</sub> )                            | 598   | 598   | -----<br>--   | -----<br>- | 468              |

|                                                                                                   |                                  |     |     |             |                          |                  |
|---------------------------------------------------------------------------------------------------|----------------------------------|-----|-----|-------------|--------------------------|------------------|
| Re(CO) <sub>3</sub> Cl(4,7-diphenylphen)                                                          | MeCN(0.1 M TBAClO <sub>4</sub> ) | 610 | 610 | -----<br>-- | -----<br>-               | 468              |
| Re(CO) <sub>3</sub> Cl(phen)/THPO (Cross-R)                                                       | MeCN(0.1M TBABF <sub>4</sub> )   | 610 | 610 | -----<br>-- | -----<br>-               | 143,<br>469      |
| Re(CO) <sub>3</sub> Cl(phen)                                                                      | MeCN(0.1M TBAPF <sub>6</sub> )   | 601 | 601 | 0.00<br>26  | 6.4x1<br>0 <sup>-4</sup> | 470              |
| Re(CO) <sub>3</sub> Cl(2,9-Me <sub>2</sub> phen)                                                  | MeCN(0.1M TBAPF <sub>6</sub> )   | 595 | 595 | 0.01<br>2   | 5.1x1<br>0 <sup>-4</sup> | 470              |
| Re(CO) <sub>3</sub> Cl(5,6-Me <sub>2</sub> phen)                                                  | MeCN(0.1M TBAPF <sub>6</sub> )   | 599 | 599 | 0.02<br>2   | 4.2x1<br>0 <sup>-4</sup> | 470              |
| Re(CO) <sub>3</sub> Cl(4,7-Me <sub>2</sub> phen)                                                  | MeCN(0.1M TBAPF <sub>6</sub> )   | 588 | 588 | 0.04<br>4   | 0.001<br>1               | 470              |
| Re(CO) <sub>3</sub> Cl(3,4,7,8-Me <sub>4</sub> phen)                                              | MeCN(0.1M TBAPF <sub>6</sub> )   | 599 | 599 | 0.00<br>44  | 3.1x1<br>0 <sup>-5</sup> | 470              |
| Re(CO) <sub>3</sub> Cl(bpy)                                                                       | MeCN(0.1M TBAPF <sub>6</sub> )   | 609 | 609 | 0.02<br>3   | 2.9x1<br>0 <sup>-4</sup> | 470              |
| Re(CO) <sub>3</sub> Cl(4,4'-Me <sub>2</sub> bpy)                                                  | MeCN(0.1M TBAPF <sub>6</sub> )   | 599 | 599 | 0.01<br>7   | 6.9x1<br>0 <sup>-4</sup> | 470              |
| Re(CO) <sub>3</sub> Cl(phen)/S <sub>2</sub> O <sub>8</sub> <sup>2-</sup>                          | MeCN(0.1M TBAPF <sub>6</sub> )   | 601 | 601 | 0.00<br>26  | 0.001<br>1               | 470 <sup>c</sup> |
| Re(CO) <sub>3</sub> Cl(2,9-Me <sub>2</sub> phen)/ S <sub>2</sub> O <sub>8</sub> <sup>2-</sup>     | MeCN(0.1M TBAPF <sub>6</sub> )   | 595 | 595 | 0.01<br>2   | 0.001<br>2               | 470 <sup>c</sup> |
| Re(CO) <sub>3</sub> Cl(5,6-Me <sub>2</sub> phen)/ S <sub>2</sub> O <sub>8</sub> <sup>2-</sup>     | MeCN(0.1M TBAPF <sub>6</sub> )   | 599 | 599 | 0.02<br>2   | 0.005<br>4               | 470 <sup>c</sup> |
| Re(CO) <sub>3</sub> Cl(4,7-Me <sub>2</sub> phen)/ S <sub>2</sub> O <sub>8</sub> <sup>2-</sup>     | MeCN(0.1M TBAPF <sub>6</sub> )   | 588 | 588 | 0.04<br>4   | 0.030                    | 470 <sup>c</sup> |
| Re(CO) <sub>3</sub> Cl(3,4,7,8-Me <sub>4</sub> phen)/ S <sub>2</sub> O <sub>8</sub> <sup>2-</sup> | MeCN(0.1M TBAPF <sub>6</sub> )   | 599 | 599 | 0.00<br>44  | 0.004<br>9               | 470 <sup>c</sup> |
| Re(CO) <sub>3</sub> Cl(bpy)/S <sub>2</sub> O <sub>8</sub> <sup>2-</sup>                           | MeCN(0.1M TBAPF <sub>6</sub> )   | 609 | 609 | 0.02<br>3   | 0.003<br>1               | 470 <sup>c</sup> |
| Re(CO) <sub>3</sub> Cl(4,4'-Me <sub>2</sub> bpy)/ S <sub>2</sub> O <sub>8</sub> <sup>2-</sup>     | MeCN(0.1M TBAPF <sub>6</sub> )   | 599 | 599 | 0.01<br>7   | 0.004<br>3               | 470 <sup>c</sup> |
| Re(CO) <sub>3</sub> Cl(phen)/TPrA                                                                 | MeCN(0.1M TBAPF <sub>6</sub> )   | 601 | 601 | 0.00<br>26  | 0.087                    | 470 <sup>c</sup> |

|                                                                                                   |                                                            |       |       |               |              |                  |
|---------------------------------------------------------------------------------------------------|------------------------------------------------------------|-------|-------|---------------|--------------|------------------|
| Re(CO) <sub>3</sub> Cl(2,9-Me <sub>2</sub> phen)/ TPrA                                            | MeCN(0.1M TBAPF <sub>6</sub> )                             | 595   | 595   | 0.01<br>2     | 0.12         | 470 <sup>c</sup> |
| Re(CO) <sub>3</sub> Cl(5,6-Me <sub>2</sub> phen)/ TPrA                                            | MeCN(0.1M TBAPF <sub>6</sub> )                             | 599   | 599   | 0.02<br>2     | 0.12         | 470 <sup>c</sup> |
| Re(CO) <sub>3</sub> Cl(4,7-Me <sub>2</sub> phen)/ TPrA                                            | MeCN(0.1M TBAPF <sub>6</sub> )                             | 588   | 588   | 0.04<br>4     | 0.22         | 470 <sup>c</sup> |
| Re(CO) <sub>3</sub> Cl(3,4,7,8-Me <sub>4</sub> phen)/ TPrA                                        | MeCN(0.1M TBAPF <sub>6</sub> )                             | 599   | 599   | 0.00<br>44    | 0.002<br>7   | 470 <sup>c</sup> |
| Re(CO) <sub>3</sub> Cl(bpy)/ TPrA                                                                 | MeCN(0.1M TBAPF <sub>6</sub> )                             | 609   | 609   | 0.02<br>3     | 0.52         | 470 <sup>c</sup> |
| Re(CO) <sub>3</sub> Cl(4,4'-Me <sub>2</sub> bpy)/ TPrA                                            | MeCN(0.1M TBAPF <sub>6</sub> )                             | 599   | 599   | 0.01<br>7     | 0.40         | 470 <sup>c</sup> |
| <sup>1</sup> SiPc(OR) <sub>2</sub>                                                                | CH <sub>2</sub> Cl <sub>2</sub> (0.1M TBAPF <sub>6</sub> ) | ~684  | 725   | -----<br>--   | -----<br>-   | 471              |
| <sup>1</sup> SiNc(OR) <sub>2</sub>                                                                | CH <sub>2</sub> Cl <sub>2</sub> (0.1M TBAPF <sub>6</sub> ) | ~792  | 828   | -----<br>--   | -----<br>-   | 471              |
| <sup>1</sup> RO(SiPcO) <sub>2</sub> R                                                             | CH <sub>2</sub> Cl <sub>2</sub> (0.1M TBAPF <sub>6</sub> ) | ----- | ----- | -----<br>--   | -----<br>-   | 471              |
| Si-NC                                                                                             | DMF & MeCN (0.1 M THAClO <sub>4</sub> )                    | 420   | 640   | -----<br>---- | -----<br>--- | 161              |
| Ag <sup>+</sup> -DALM                                                                             | H <sub>2</sub> O (0.15 M KH <sub>2</sub> PO <sub>4</sub> ) |       |       |               |              | 472              |
| Ag(I)-HDEA                                                                                        | H <sub>2</sub> O (KOH-KCl, pH = 12.8)                      |       |       |               |              | 473              |
| Tb(TTFA) <sub>3</sub> (phen)                                                                      | MeCN(0.05M TBABF <sub>4</sub> )                            | 565   | ----- | -----<br>--   | -----<br>-   | 143 <sup>d</sup> |
| Tb(TTFA) <sub>4</sub> <sup>-</sup>                                                                | MeCN(0.05M TBABF <sub>4</sub> )                            | 565   | ----- | -----<br>--   | -----<br>-   | 143 <sup>d</sup> |
| Tl-tunichrome/TPrA                                                                                | H <sub>2</sub> O (0.15 M KH <sub>2</sub> PO <sub>4</sub> ) |       |       |               |              | 452              |
| W <sub>6</sub> X <sub>8</sub> Y <sub>6</sub> <sup>2-</sup> (X,Y = Cl,Br,I; X=Cl, Y-Br; X-I, Y=Br) | MeCN(0.1M TBAP)                                            |       |       |               |              | 458              |

Notes: Ligand abbreviations are listed at the end of the article in section 6. Coreactants are listed after the backslash (e.g., Ru(bpy)<sub>3</sub><sup>2+</sup>/TPrA where TPrA is the coreactant). If no coreactant is listed then ECL was generated via annihilation. In certain instances annihilation ECL was generated using cross-reactions between two different species (e.g., equations 17 - 20). In those cases the cross-reactant is listed after the backslash and the reaction identified with (Cross-R). The spectroscopic and ECL data listed was either

reported directly in the cited paper, or was extrapolated from data. In those instances where no ECL spectra and/or efficiencies were reported only the compound, conditions and reference are listed.

Photoluminescence efficiencies ( $\phi_{em}$ ) and annihilation ECL efficiencies ( $\phi_{em}$ ) are relative to  $Ru(bpy)_3^{2+}$  at 0.062 and 0.05, respectively, unless otherwise noted. Coreactant ECL efficiencies where TPrA is the coreactant are relative to  $Ru(bpy)_3^{2+}/TPrA$  at 1.0 unless otherwise noted. a) Volts vs  $Fc/Fc^+$  (0.631 V vs NHE). b) Relative to diphenylanthracene ( $\phi_{ecl} = 6.3\%$ ). c) Relative ECL efficiency with respect to  $Ru(bpy)_3^{2+}/Coreactant$  ( $\phi_{ecl} = 1$ ). d) weak ECL such that no spectrum was obtained. e) ECL generated via cross-reaction between  $Mo_6Cl_{14}^-$  and electroactive donor species ( $D^-$ ; nitroaromatic radical anions). f) ECL generated via cross reaction between  $Mo_6Cl_{14}^{3-}$  and electroactive acceptor species ( $A^+$ ; aromatic amine radical cations). g) relative to  $Cr(bpy)_3(ClO_4)_2$ . h) assigned a value of 1.0 for comparison purposes. i) set to 1.0 for comparison to CE-bpy in MeCN. Relative  $\phi_{ecl}$  vs  $Ru(bpy)_3^{2+}/TPrA$  not reported. j) relative to CE-bpy in  $H_2O$  ( $\phi_{ecl} = 1$ ). k) Set to 1.0 for comparison with Den-8-Ru. l) relative to  $(bpy)_2Ru(bpy-O-C_8)^{2+}$  at 1.0. l)  $[SiPc(OR)_2]$  = bis(tri-*n*-hexylsiloxy)(2,3-phthalocyaninato)silicon;  $RO(SiPcO)_2R$  = dimer of  $[SiPc(OR)_2]$ ;  $[SiNc(OR)_2]$  = bis(tri-*n*-hexylsiloxy)(2,3-naphthalocyaninato)silicon. m), For Boron complexes, ref "51",  $\phi_{em}$  relative to PM 567 as a standard (0.87 in MeCN). n) relative to fluorescein 27 in 0.1 N NaOH ( $0.90 \pm 0.03$ ). o)  $\phi_{em}$  relative to  $Ru(bpy)_3^{2+}$  in MeCN (0.067). p)  $\phi_{ecl}$  relative to  $Ru(bpy)_3^{2+}/TPra$  (1.0) and  $\phi_{em}$  values obtained in thoroughly degassed dichloromethane solution using Rhodamine 6G in ethanol ( $\phi_{em}=0.95$ ) as a standard.
