# Supplementary material for: ECL—Electrochemical luminescence
Source: Royal Society of Chemistry journal article supplement (doi:10.1039/b605635k), 2007-01-01
Supplement: b605635k6.pdf [file b605635k6.pdf]

**Table S6. ECL Assays for Clinical Applications.**

| Analyte                                  | Luminophore/Coreactant <sup>a</sup>                                             | References                                            |
|------------------------------------------|---------------------------------------------------------------------------------|-------------------------------------------------------|
| AFP                                      | Ru(bpy) <sub>3</sub> <sup>2+</sup>                                              | 377                                                   |
| AFP                                      | Ru(bpy) <sub>3</sub> <sup>2+</sup> /TPrA                                        | 293,294                                               |
| Alcohols                                 | Ru(bpy) <sub>3</sub> <sup>2+</sup>                                              | 551-553                                               |
| Alicyclic tertiary amines                | Ru(bpy) <sub>3</sub> <sup>2+</sup>                                              | 554                                                   |
| Amines (primary) – derivatized with DVS. | Ru(bpy) <sub>3</sub> <sup>2+</sup>                                              | 555                                                   |
| Amino Acids                              | Ru(bpy) <sub>3</sub> <sup>2+</sup>                                              | 555                                                   |
| Amino Acids                              | [Ru(bpy) <sub>2</sub> dcbl]Cl <sub>2</sub>                                      | 556                                                   |
| Amino Acids                              | [Ru(bpy) <sub>2</sub> dcbl]Cl <sub>2</sub> thin films                           | 556                                                   |
| Amitriptyline                            | Ru(bpy) <sub>3</sub> <sup>2+</sup>                                              | 557                                                   |
| Amino Acids (Dansylated)                 | Ru(bpy) <sub>3</sub> <sup>2+</sup>                                              | 558                                                   |
| β-amyloid peptide                        | Ru(bpy) <sub>3</sub> <sup>2+</sup> /TPrA                                        | 350                                                   |
| Amyloid-β(40)                            | Ru(bpy) <sub>3</sub> <sup>2+</sup> /TPrA                                        | 559                                                   |
| Anti-Borna disease antibodies            | Ru(bpy) <sub>3</sub> <sup>2+</sup> /TPrA                                        | 328-330                                               |
| Antihistamines                           | Ru(bpy) <sub>3</sub> <sup>2+</sup>                                              | 558                                                   |
| Apo 8-100 gene mutation                  | Ru(bpy) <sub>3</sub> <sup>2+</sup> /TPrA                                        | 374                                                   |
| Arginine                                 | Ru(bpy) <sub>3</sub> <sup>2+</sup>                                              | 558                                                   |
| Ascorbic acid                            | Ru(bpy) <sub>3</sub> <sup>2+</sup>                                              | 558                                                   |
| Astrovirus                               | Ru(bpy) <sub>3</sub> <sup>2+</sup>                                              | 368                                                   |
| Atropine                                 | Ru(bpy) <sub>3</sub> <sup>2+</sup>                                              | 558                                                   |
| BSA                                      | Ru(bpy) <sub>3</sub> <sup>2+</sup> /DMBD                                        | 560                                                   |
| Bupivacaine                              | Ru(bpy) <sub>3</sub> <sup>2+</sup>                                              | 558                                                   |
| Cancer Antigen 15-3                      | Ru(bpy) <sub>3</sub> <sup>2+</sup> /TPrA                                        | 294,561                                               |
| Cancer Antigen 19-9                      | Ru(bpy) <sub>3</sub> <sup>2+</sup> /TPrA                                        | 294                                                   |
| Cancer Antigen 72-4                      | Ru(bpy) <sub>3</sub> <sup>2+</sup> /TPrA                                        | 397                                                   |
| Cancer Antigen 125                       | Ru(bpy) <sub>3</sub> <sup>2+</sup> /TPrA                                        | 562,563                                               |
| Carbon dioxide                           | Ru(bpy) <sub>3</sub> <sup>2+</sup> /NADH                                        | 564                                                   |
| Carcinoembryonic antigen                 | Ru(bpy) <sub>3</sub> <sup>2+</sup> /TPrA                                        | 294,295                                               |
| Cholesterol                              | Ru(bpy) <sub>3</sub> <sup>2+</sup> /C <sub>2</sub> O <sub>4</sub> <sup>2-</sup> | 293                                                   |
| Choline                                  | Luminol/H <sub>2</sub> O <sub>2</sub>                                           | 565                                                   |
| chlorpromazine                           | Ru(bpy) <sub>3</sub> <sup>2+</sup>                                              | 558                                                   |
| Citrate                                  | Ru(bpy) <sub>3</sub> <sup>2+</sup>                                              | 566                                                   |
| CKMB, creatine base                      | Ru(bpy) <sub>3</sub> <sup>2+</sup> /TPrA                                        | 295,314 <b>Error!</b><br><b>Bookmark not defined.</b> |
| Clindamycin-2-phosphate                  | Ru(bpy) <sub>3</sub> <sup>2+</sup>                                              | 558                                                   |
| Anti-CMV antibodies                      | Ru(bpy) <sub>3</sub> <sup>2+</sup> /TPrA                                        | 327                                                   |
| CMV DNA                                  | Ru(bpy) <sub>3</sub> <sup>2+</sup> /TPrA                                        | 535                                                   |
| CMV mRNA                                 | Ru(bpy) <sub>3</sub> <sup>2+</sup> /TPrA                                        | 284                                                   |

|                                                         |                                                          |             |
|---------------------------------------------------------|----------------------------------------------------------|-------------|
| Codeine                                                 | $\text{Ru}(\text{bpy})_3^{2+}$                           | 558         |
| Coxsackievirus B3 RNA                                   | $\text{Ru}(\text{bpy})_3^{2+}/\text{TPrA}$               | 567         |
| Creatine kinase muscle brain                            | $\text{Ru}(\text{bpy})_3^{2+}/\text{TPrA}$               | 295,308     |
| $\beta$ -crosslaps                                      | $\text{Ru}(\text{bpy})_3^{2+}/\text{TPrA}$               | 321-322     |
| Cystic Fibrosis $\Delta\text{F}$ -508 deletion mutation | $\text{Ru}(\text{bpy})_3^{2+}$                           | 352         |
| Cytokeratin 19                                          | $\text{Ru}(\text{bpy})_3^{2+}/\text{TPrA}$               | 303         |
| Cytokine                                                | $\text{Ru}(\text{bpy})_3^{2+}/\text{TPrA}$               | 568         |
| Cytomegalovirus                                         | $\text{Ru}(\text{bpy})_3^{2+}/\text{TPrA}$               | 331         |
| Dengue virus RNA                                        | $\text{Ru}(\text{bpy})_3^{2+}/\text{TPrA}$               | 357         |
| Des- $\gamma$ -carboxy prothrombin                      | $\text{Ru}(\text{bpy})_3^{2+}/\text{TPrA}$               | 304,305     |
| Dextromethrophan                                        | $\text{Ru}(\text{bpy})_3^{2+}$                           | 558         |
| Digoxin                                                 | $\text{Ru}(\text{bpy})_3^{2+}$                           | 369         |
| Digoxin                                                 | Luminol                                                  | 569         |
| Digoxin                                                 | Luminol                                                  | 570         |
| Dioxopromethazine                                       | $\text{Ru}(\text{bpy})_3^{2+}/\text{dioxopromethazine}$  | 571         |
| DNA Hybridization                                       | $\text{Ru}(\text{bpy})_2(\text{dcbpy})^{2+}/\text{TPrA}$ | 96          |
| Doxepin                                                 | $\text{Ru}(\text{bpy})_3^{2+}$                           | 557         |
| EDTA                                                    | $\text{Ru}(\text{bpy})_3^{2+}$                           | 566         |
| Emeline dithiocarbamate copper(II)                      | $\text{Ru}(\text{bpy})_3^{2+}$                           | 566         |
| Enterovirus                                             | $\text{Ru}(\text{bpy})_3^{2+}/\text{TPrA}$               | 359         |
| Epstein-Barr virus DNA                                  | $\text{Ru}(\text{bpy})_3^{2+}/\text{TPrA}$               | 355         |
| Erythromycin                                            | $\text{Ru}(\text{bpy})_3^{2+}$                           | 19,572      |
| Estradiol                                               | $\text{Ru}(\text{bpy})_3^{2+}/\text{TPrA}$               | 306         |
| Ethanol                                                 | $\text{Ru}(\text{bpy})_3^{2+}/\text{NADH}$               | 564,573     |
| Glycophosphate and related systems                      | $\text{Ru}(\text{bpy})_3^{2+}$                           | 574         |
| $\Delta\text{F}$ 508 deletion                           | $\text{Ru}(\text{bpy})_3^{2+}/\text{TPrA}$               | 376         |
| Fatty amine ethoxylate surfactants                      | $\text{Ru}(\text{bpy})_3^{2+}$                           | 562         |
| Ferritin                                                | $\text{Ru}(\text{bpy})_3^{2+}/\text{TPrA}$               | 294         |
| FSH, follitropin                                        | $\text{Ru}(\text{bpy})_3^{2+}/\text{TPrA}$               | 306         |
| Foot-and-Mouth Disease                                  | $\text{Ru}(\text{bpy})_3^{2+}/\text{TPrA}$               | 361         |
| Glucose                                                 | $\text{Ru}(\text{bpy})_3^{2+}/\text{NADH}$               | 564,573     |
| Glucose                                                 | $\text{Ru}(\text{bpy})_3^{2+}/\text{TPrA}$               | 575         |
| Glucose                                                 | Luminol/ $\text{H}_2\text{O}_2$                          | 565         |
| Glutamate                                               | Luminol/ $\text{H}_2\text{O}_2$                          | 565         |
| HAsAg, hepatitis A virus surface antigen                | $\text{Ru}(\text{bpy})_3^{2+}/\text{TPrA}$               | 284         |
| HBsAg, hepatitis B virus surface antigen                | $\text{Ru}(\text{bpy})_3^{2+}/\text{TPrA}$               | 318-320,332 |

|                                                  |                                                            |                 |
|--------------------------------------------------|------------------------------------------------------------|-----------------|
| HCG                                              | Ru(bpy) <sub>3</sub> <sup>2+</sup> /TPrA                   | 295,308         |
| Heroin                                           | Ru(bpy) <sub>3</sub> <sup>2+</sup>                         | 558             |
| Heroin                                           | Ru(bpy) <sub>3</sub> <sup>2+</sup>                         | 576             |
| HIV DNA                                          | Ru(bpy) <sub>3</sub> <sup>2+</sup> /TPrA                   | 352,362,363,364 |
| HIV-1 Gag Gene                                   | Ru(bpy) <sub>3</sub> <sup>2+</sup>                         | 577             |
| HIV-1 p7 antigen                                 | Ru(bpy) <sub>3</sub> <sup>2+</sup> /TPrA                   | 350             |
| HIV-1 RNA                                        | Ru(bpy) <sub>3</sub> <sup>2+</sup> /TPrA                   | 353,363         |
| HPIV 1/2/3                                       | Ru(bpy) <sub>3</sub> <sup>2+</sup> /TPrA                   | 577             |
| Hydrazine and hydrazine derivatives              | Ru(bpy) <sub>3</sub> <sup>2+</sup>                         | 19              |
| Human C-Reactive Protein (hCRP)                  | Terbium Chelate via Cathodic Luminescence                  | 578             |
| IgE, immunoglobulin E                            | Ru(bpy) <sub>3</sub> <sup>2+</sup> /TPrA                   | 579             |
| IgG, immunoglobulin G                            | Ru(bpy) <sub>3</sub> <sup>2+</sup> /DMBD                   | 560             |
| Influenza virus RNA                              | Ru(bpy) <sub>3</sub> <sup>2+</sup> /TPrA                   | 360,361         |
| Insulin                                          | Ru(bpy) <sub>3</sub> <sup>2+</sup> /TPrA                   | 580,326         |
| Interferon-γ                                     | Ru(bpy) <sub>3</sub> <sup>2+</sup> /TPrA                   | 336             |
| IL (Interleukin)-2                               | Ru(bpy) <sub>3</sub> <sup>2+</sup> /TPrA                   | 336             |
| IL (Interleukin)-4                               | Ru(bpy) <sub>3</sub> <sup>2+</sup> /TPrA                   | 336             |
| IL (Interleukin)-6                               | Ru(bpy) <sub>3</sub> <sup>2+</sup> /TPrA                   | 294             |
| IL (Interleukin)-8                               | Ru(bpy) <sub>3</sub> <sup>2+</sup> /TPrA                   | 294             |
| IL (Interleukin)-10                              | Ru(bpy) <sub>3</sub> <sup>2+</sup> /TPrA                   | 336             |
| IL (Interleukin)-10                              | Ru(bpy) <sub>3</sub> <sup>2+</sup> /TPrA                   | 337,581         |
| IL (Interleukin)-18 binding protein              | Ru(bpy) <sub>3</sub> <sup>2+</sup> /TPrA                   | 337             |
| Lactate                                          | Ru(bpy) <sub>3</sub> <sup>2+</sup>                         | 582             |
| Lactate                                          | Ru(bpy) <sub>3</sub> <sup>2+</sup> /NADH                   | 573             |
| Lactate                                          | Luminol/H <sub>2</sub> O <sub>2</sub>                      | 306             |
| β-Lactamase                                      | Ru(bpy) <sub>3</sub> <sup>2+</sup> /Hydrolyzed β-Lactamase | 573             |
| Legionella antigen                               | Ru(bpy) <sub>3</sub> <sup>2+</sup> /triethylamine          | 306             |
| Leucine                                          | Ru(bpy) <sub>3</sub> <sup>2+</sup>                         | 558             |
| CTC <sub>4</sub> , Leukotriene                   | Ru(bpy) <sub>3</sub> <sup>2+</sup> /TPrA                   | 583             |
| LTB <sub>4</sub> , Leukotriene                   | Ru(bpy) <sub>3</sub> <sup>2+</sup> /TPrA                   | 583             |
| LH, lutropin                                     | Ru(bpy) <sub>3</sub> <sup>2+</sup> /TPrA                   | 306             |
| lignocaine                                       | Ru(bpy) <sub>3</sub> <sup>2+</sup>                         | 584             |
| Lysine                                           | Luminol/H <sub>2</sub> O <sub>2</sub>                      | 565             |
| Malonate                                         | Ru(bpy) <sub>3</sub> <sup>2+</sup>                         | 582             |
| Morpholine Fungicides (dodemorph and tridemorph) | Ru(bpy) <sub>3</sub> <sup>2+</sup>                         | 585             |
| Nortriptyline                                    | Ru(bpy) <sub>3</sub> <sup>2+</sup>                         | 557             |
| Oligonucleotides                                 | TAMRA (Cathodic Luminescence)                              | 586             |
| Osteocalcin                                      | Ru(bpy) <sub>3</sub> <sup>2+</sup> /TPrA                   | 323             |

|                                                        |                                          |                 |
|--------------------------------------------------------|------------------------------------------|-----------------|
| Oxalate (C <sub>2</sub> O <sub>4</sub> <sup>2-</sup> ) | Ru(bpy) <sub>3</sub> <sup>2+</sup>       | 51,558          |
| Oxaprenolol                                            | Ru(bpy) <sub>3</sub> <sup>2+</sup>       | 558             |
| Pancreatic phospholipase A2                            | Terbium chelate                          | 39              |
| Parathyroid hormone                                    | Ru(bpy) <sub>3</sub> <sup>2+</sup> /TPrA | 586             |
| Persulfate                                             | Ru(bpy) <sub>3</sub> <sup>2+</sup>       | 587             |
| Persulfate                                             | Ru(bpz) <sub>3</sub> <sup>2+</sup>       | 420,588         |
| Plasma vascular endothelial growth factor              | Ru(bpy) <sub>3</sub> <sup>2+</sup> /TPrA | 589             |
| Procaine                                               | Ru(bpy) <sub>3</sub> <sup>2+</sup>       | 590             |
| Procyclidine                                           | Ru(bpy) <sub>3</sub> <sup>2+</sup>       | 558             |
| Prolactin                                              | Ru(bpy) <sub>3</sub> <sup>2+</sup> /TPrA | 306             |
| Promazine                                              | Ru(bpy) <sub>3</sub> <sup>2+</sup>       | 557             |
| PGE2, Prostaglandin                                    | Ru(bpy) <sub>3</sub> <sup>2+</sup> /TPrA | 583             |
| PGD2, Prostaglandin                                    | Ru(bpy) <sub>3</sub> <sup>2+</sup> /TPrA | 583             |
| Prostrate specific antigen                             | Ru(bpy) <sub>3</sub> <sup>2+</sup> /TPrA | 295,298         |
| Prothrombin                                            | Ru(bpy) <sub>3</sub> <sup>2+</sup> /TPrA | 304,305         |
| Prothrombin gene mutation                              | Ru(bpy) <sub>3</sub> <sup>2+</sup> /TPrA | 375             |
| Pryogallol                                             | Luminol                                  | 592             |
| Pyruvate                                               | Ru(bpy) <sub>3</sub> <sup>2+</sup>       | 557,565         |
| mRNA                                                   | Ru(bpy) <sub>3</sub> <sup>2+</sup> /TPrA | 299-301         |
| Serine                                                 | Ru(bpy) <sub>3</sub> <sup>2+</sup>       | 558             |
| Serum interferon - α                                   | Ru(bpy) <sub>3</sub> <sup>2+</sup> /TPrA | 337,358         |
| St. Louis Encephalitis                                 | Ru(bpy) <sub>3</sub> <sup>2+</sup> /TPrA | 358             |
| Tartrate                                               | Ru(bpy) <sub>3</sub> <sup>2+</sup>       | 566             |
| Testosterone                                           | Ru(bpy) <sub>3</sub> <sup>2+</sup> /TPrA | 193,306         |
| T4, thyroxine                                          | Ru(bpy) <sub>3</sub> <sup>2+</sup> /TPrA | 295,309,311,313 |
| T3, triiodothyronine                                   | Ru(bpy) <sub>3</sub> <sup>2+</sup> /TPrA | 295,309,311     |
| TXB2, Thromboxane                                      | Ru(bpy) <sub>3</sub> <sup>2+</sup> /TPrA | 583             |
| Thyroid stimulating hormone                            | Ru(bpy) <sub>3</sub> <sup>2+</sup> /TPrA | 295,309,311     |
| Thyroid stimulating hormone                            | Terbium chelate                          | 312             |
| C-telopeptides                                         | Ru(bpy) <sub>3</sub> <sup>2+</sup> /TPrA | 323             |
| Thiazide compounds                                     | Ru(bpy) <sub>3</sub> <sup>2+</sup>       | 558             |
| Thyrotrophin                                           | Ru(bpy) <sub>3</sub> <sup>2+</sup>       | 293             |
| Trialkylamines                                         | Ru(bpy) <sub>3</sub> <sup>2+</sup>       | 257             |
| Tri- <i>n</i> -propylamine (TPrA)                      | Ru(bpy) <sub>3</sub> <sup>2+</sup>       | 27              |
| Troponin                                               | Ru(bpy) <sub>3</sub> <sup>2+</sup> /TPrA | 295,314         |
| L-tryptophan                                           | Ru(bpy) <sub>3</sub> <sup>2+</sup>       | 592             |
| Tumor necrosis factor - α                              | Ru(bpy) <sub>3</sub> <sup>2+</sup> /TPrA | 593             |
| E2 and E3 Ubiquitin Ligases                            | Ru(bpy) <sub>3</sub> <sup>2+</sup> /TPrA | 289,289,594     |

Supplementary Material (ESI) for Annual Reports C  
This journal is (c) The Royal Society of Chemistry 2007

|                               |                                          |         |
|-------------------------------|------------------------------------------|---------|
| Urate                         | Luminol/H <sub>2</sub> O <sub>2</sub>    | 565     |
| Valine                        | Ru(bpy) <sub>3</sub> <sup>2+</sup>       | 558,595 |
| Varicella-Zoster virus<br>DNA | Ru(bpy) <sub>3</sub> <sup>2+</sup> /TPrA | 357     |
| West Nile Virus RNA           | Ru(bpy) <sub>3</sub> <sup>2+</sup> /TPrA | 358     |
| 2-Whiouracil                  | Ru(bpy) <sub>3</sub> <sup>2+</sup>       | 596     |
| YFP-GL-GPI                    | Ru(bpy) <sub>3</sub> <sup>2+</sup> /TPrA | 291     |

<sup>a</sup>If no coreactant is listed, then the analyte acted as the ECL coreactant.
